# Supplementary material for: Effects of nintedanib in patients with idiopathic pulmonary fibrosis by GAP stage
Source: PubMed Central journal article supplement — ERJ Open Res. 2019 Apr 29;5(2):00127-2018. doi: 10.1183/23120541.00127-2018 (PMC6487272; doi:10.1183/23120541.00127-2018), 2019-04-29
Supplement: 00127-2018.supp.pdf [file 00127-2018.supp.pdf]

## Supplementary Material

**Figure S1.** Annual rate of decline in forced vital capacity by baseline GAP stage (I, II, III)

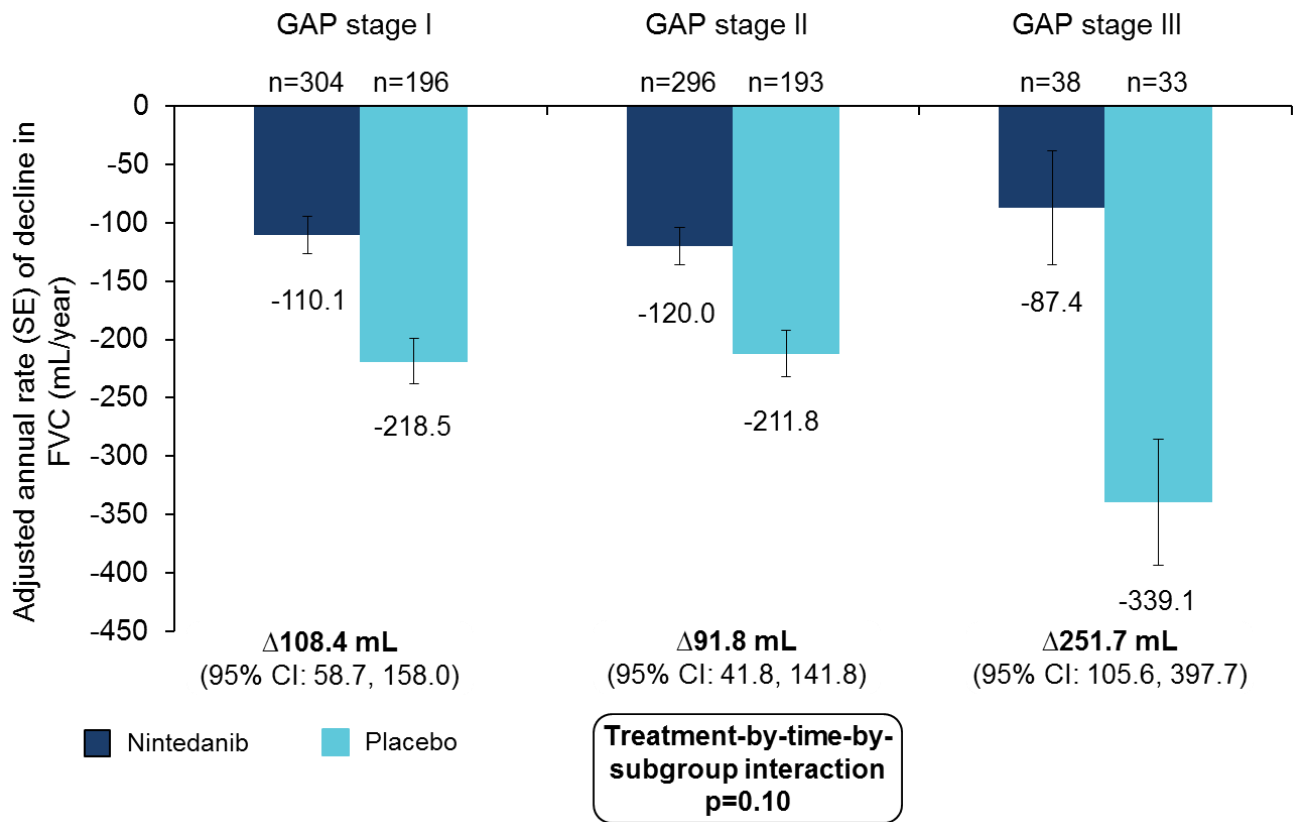

**Figure S2.** Change from baseline in SGRQ total score by subgroup at week 52 by baseline GAP stage (I, II, III)

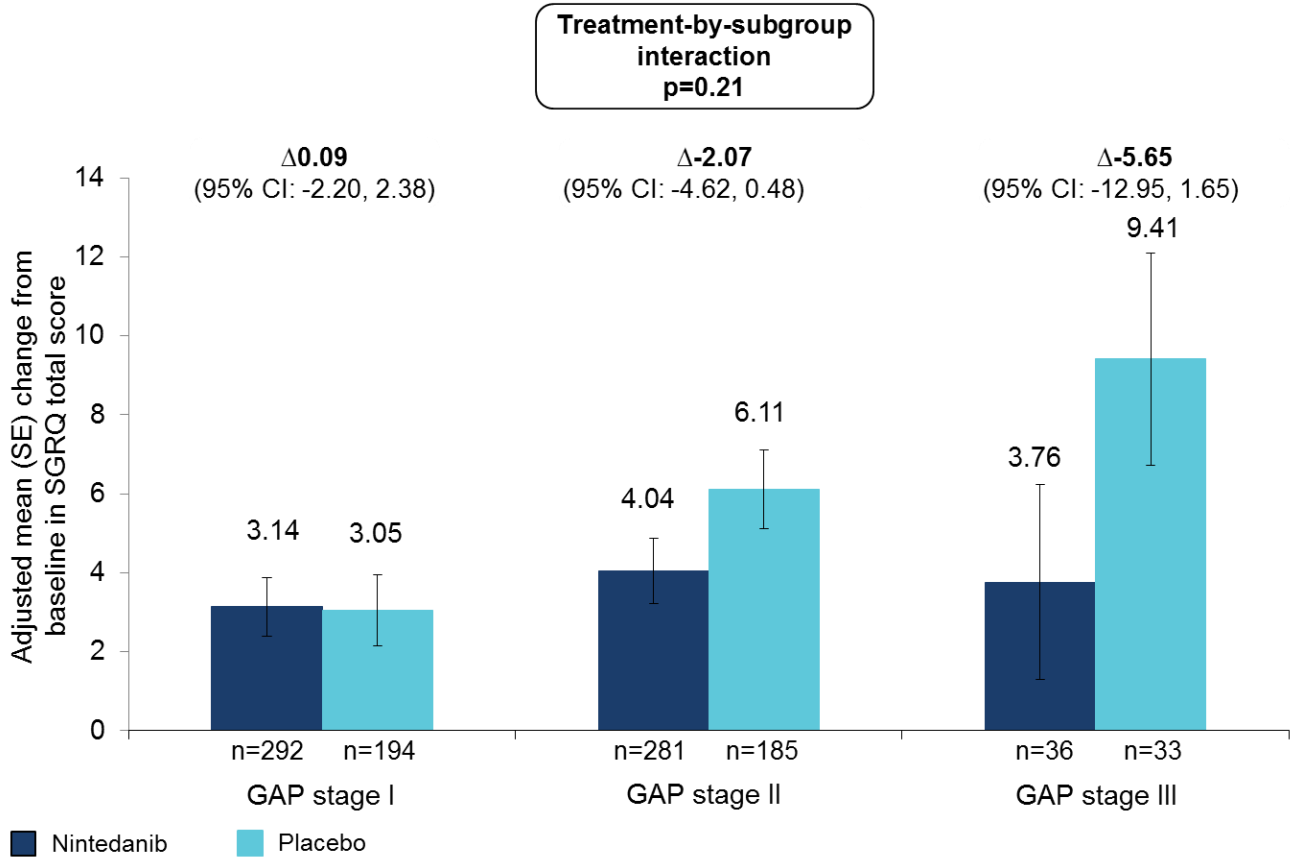

**Table S1.** GAP index and GAP stage at baseline

| <b>GAP index</b> | <b>Nintedanib</b> | <b>Placebo</b> | <b>Total</b> | <b>GAP stage</b> | <b>Total</b> |
|------------------|-------------------|----------------|--------------|------------------|--------------|
| <b>8</b>         | 0                 | 0              | 0            | <b>III</b>       | 71 (6.7)     |
| <b>7</b>         | 0                 | 0              | 0            |                  |              |
| <b>6</b>         | 38 (6.0)          | 33 (7.8)       | 71 (6.7)     |                  |              |
| <b>5</b>         | 108 (16.9)        | 76 (18.0)      | 184 (17.3)   | <b>II</b>        | 489 (46.1)   |
| <b>4</b>         | 188 (29.5)        | 117 (27.7)     | 305 (28.7)   |                  |              |
| <b>3</b>         | 176 (27.6)        | 116 (27.4)     | 292 (27.5)   | <b>I</b>         | 500 (47.1)   |
| <b>2</b>         | 91 (14.3)         | 57 (13.5)      | 148 (13.9)   |                  |              |
| <b>1</b>         | 30 (4.7)          | 21 (5.0)       | 51 (4.8)     |                  |              |
| <b>0</b>         | 7 (1.1)           | 2 (0.5)        | 9 (0.8)      |                  |              |
| <b>Missing</b>   | 0 (0.0)           | 1 (0.2)        | 1 (0.1)      | <b>Missing</b>   | 1 (0.1)      |
| <b>Total</b>     | 638 (100)         | 423 (100)      | 1061 (100)   | <b>Total</b>     | 1061 (100)   |

Data shown are n (%).

**Table S2.** FVC % predicted and DLco % predicted by baseline GAP stage

| GAP stage I             | DLco % predicted |              |              |              |              |              |
|-------------------------|------------------|--------------|--------------|--------------|--------------|--------------|
|                         | ≥60<br>n (%)     | ≥50<br>n (%) | ≥40<br>n (%) | ≥30<br>n (%) | <30<br>n (%) | All<br>n (%) |
| <b>FVC % predicted</b>  |                  |              |              |              |              |              |
| ≥100                    | 52 (10.4)        | 82 (16.4)    | 107 (21.4)   | 112 (22.4)   | 1 (0.2)      | 113 (22.6)   |
| ≥90                     | 80 (16.0)        | 129 (25.8)   | 175 (35.0)   | 186 (37.2)   | 3 (0.6)      | 189 (37.8)   |
| ≥80                     | 123 (24.6)       | 211 (42.2)   | 289 (57.8)   | 317 (63.4)   | 3 (0.6)      | 320 (64.0)   |
| ≥70                     | 138 (27.6)       | 252 (50.4)   | 354 (70.8)   | 399 (79.8)   | 4 (0.8)      | 403 (80.6)   |
| ≥60                     | 151 (30.2)       | 281 (56.2)   | 407 (81.4)   | 467 (93.4)   | 5 (1.0)      | 472 (94.4)   |
| ≥50                     | 156 (31.2)       | 290 (58.0)   | 426 (85.2)   | 494 (98.8)   | 6 (1.2)      | 500 (100.0)  |
| <50                     | 0 (0.0)          | 0 (0.0)      | 0 (0.0)      | 0 (0.0)      | 0 (0.0)      | 0 (0.0)      |
| All                     | 156 (31.2)       | 290 (58.0)   | 426 (85.2)   | 494 (98.8)   | 6 (1.2)      | 500 (100.0)  |
| <b>GAP stage II/III</b> |                  |              |              |              |              |              |
| <b>FVC % predicted</b>  |                  |              |              |              |              |              |
| ≥100                    | 0 (0.0)          | 7 (1.3)      | 20 (3.6)     | 30 (5.4)     | 1 (0.2)      | 31 (5.5)     |
| ≥90                     | 0 (0.0)          | 21 (3.8)     | 56 (10.0)    | 83 (14.8)    | 2 (0.4)      | 85 (15.2)    |
| ≥80                     | 0 (0.0)          | 39 (7.0)     | 99 (17.7)    | 158 (28.2)   | 7 (1.3)      | 165 (29.5)   |
| ≥70                     | 8 (1.4)          | 71 (12.7)    | 170 (30.4)   | 280 (50.0)   | 17 (3.0)     | 297 (53.0)   |
| ≥60                     | 16 (2.9)         | 99 (17.7)    | 245 (43.8)   | 415 (74.1)   | 34 (6.1)     | 449 (80.2)   |
| ≥50                     | 17 (3.0)         | 111 (19.8)   | 281 (50.2)   | 507 (90.5)   | 48 (8.6)     | 555 (99.1)   |
| <50                     | 0 (0.0)          | 1 (0.2)      | 2 (0.4)      | 5 (0.9)      | 0 (0.0)      | 5 (0.9)      |
| All                     | 17 (3.0)         | 112 (20.0)   | 283 (50.5)   | 512 (91.4)   | 48 (8.6)     | 560 (100.0)  |

**Table S3.** Proportions of patients with disease progression over 52 weeks and hazard ratio for time to first event by baseline GAP stage (I, II, III)

|                                                              | GAP stage I           |                    | GAP stage II          |                    | GAP stage III        |                   |
|--------------------------------------------------------------|-----------------------|--------------------|-----------------------|--------------------|----------------------|-------------------|
|                                                              | Nintedanib<br>(n=304) | Placebo<br>(n=196) | Nintedanib<br>(n=296) | Placebo<br>(n=193) | Nintedanib<br>(n=38) | Placebo<br>(n=33) |
| Absolute decline in FVC $\geq$ 10% predicted or death, n (%) | 75 (24.7)             | 78 (39.8)          | 87 (29.4)             | 78 (40.4)          | 11 (28.9)            | 19 (57.6)         |
| Hazard ratio (95% CI)                                        | 0.59 (0.43, 0.81)     |                    | 0.65 (0.47, 0.88)     |                    | 0.38 (0.17, 0.84)    |                   |
| Treatment-by-subgroup interaction                            | p=0.44                |                    |                       |                    |                      |                   |
| Criterion reached first, n (%)                               |                       |                    |                       |                    |                      |                   |
| Absolute decline in FVC $\geq$ 10% predicted                 | 69 (22.7)             | 75 (38.3)          | 71 (24.0)             | 64 (33.2)          | 8 (21.1)             | 14 (42.4)         |
| Death                                                        | 6 (2.0)               | 3 (1.5)            | 16 (5.4)              | 14 (7.3)           | 3 (7.9)              | 5 (15.2)          |
| Absolute decline in FVC $\geq$ 5% predicted or death, n (%)  | 156 (51.3)            | 142 (72.4)         | 157 (53.0)            | 135 (69.9)         | 17 (44.7)            | 25 (75.8)         |
| Hazard ratio (95% CI)                                        | 0.58 (0.46, 0.73)     |                    | 0.65 (0.52, 0.83)     |                    | 0.57 (0.30, 1.07)    |                   |
| Treatment-by-subgroup interaction                            | p=0.49                |                    |                       |                    |                      |                   |
| Criterion reached first, n (%)                               |                       |                    |                       |                    |                      |                   |
| Absolute decline in FVC $\geq$ 5% predicted                  | 154 (50.7)            | 141 (71.9)         | 148 (50.0)            | 127 (65.8)         | 15 (39.5)            | 23 (69.7)         |
| Death                                                        | 2 (0.7)               | 1 (0.5)            | 9 (3.0)               | 8 (4.1)            | 2 (5.3)              | 2 (6.1)           |

**Table S4.** Proportion of patients with an acute exacerbation and hazard ratio for time to first event by baseline GAP stage (I, II, III)

|                                                  | GAP stage I           |                    | GAP stage II          |                    | GAP stage III        |                   |
|--------------------------------------------------|-----------------------|--------------------|-----------------------|--------------------|----------------------|-------------------|
|                                                  | Nintedanib<br>(n=304) | Placebo<br>(n=196) | Nintedanib<br>(n=296) | Placebo<br>(n=193) | Nintedanib<br>(n=33) | Placebo<br>(n=38) |
| Patients with $\geq 1$ acute exacerbation, n (%) | 5 (1.6)               | 10 (5.1)           | 22 (7.4)              | 15 (7.8)           | 4 (10.5)             | 6 (18.2)          |
| Hazard ratio (95% CI)                            | 0.32 (0.11, 0.93)     |                    | 0.95 (0.49, 1.83)     |                    | 0.45 (0.12, 1.71)    |                   |
| Treatment-by-subgroup interaction                | p=0.25                |                    |                       |                    |                      |                   |

**Table S5.** Change from baseline in SGRQ domain score at week 52 by baseline GAP stage

|                                                              | GAP stage I           |                    | GAP stage II/III      |                    |
|--------------------------------------------------------------|-----------------------|--------------------|-----------------------|--------------------|
|                                                              | Nintedanib<br>(n=304) | Placebo<br>(n=196) | Nintedanib<br>(n=334) | Placebo<br>(n=226) |
| SGRQ symptoms, n                                             | 299                   | 195                | 324                   | 220                |
| Change from baseline, adjusted mean (SE)                     | 1.86 (1.11)           | 3.88 (1.37)        | 1.76 (1.06)           | 3.34 (1.29)        |
| Nintedanib versus placebo difference, adjusted mean (95% CI) | -2.01 (-5.46, 1.44)   |                    | -1.58 (-4.85, 1.69)   |                    |
| Treatment-by-subgroup interaction                            | p=0.90                |                    |                       |                    |
| SGRQ activity, n                                             | 295                   | 195                | 322                   | 218                |
| Change from baseline, adjusted mean (SE)                     | 3.81 (0.90)           | 4.45 (1.10)        | 4.71 (0.86)           | 8.35 (1.05)        |
| Nintedanib versus placebo difference, adjusted mean (95% CI) | -0.63 (-3.42, 2.15)   |                    | -3.64 (-6.32, -0.97)  |                    |
| Treatment-by-subgroup interaction                            | p=0.09                |                    |                       |                    |
| SGRQ impact, n                                               | 293                   | 196                | 318                   | 220                |
| Change from baseline, adjusted mean (SE)                     | 3.18 (0.85)           | 2.90 (1.04)        | 4.52 (0.92)           | 6.74 (1.11)        |
| Nintedanib versus placebo difference, adjusted mean (95% CI) | 0.28 (-2.35, 2.91)    |                    | -2.22 (-5.05, 0.61)   |                    |
| Treatment-by-subgroup interaction                            | p=0.12                |                    |                       |                    |

**Table S6.** Serious and fatal adverse events by baseline GAP stage

|                                                     | GAP stage I           |                    | GAP stage II/III      |                    |
|-----------------------------------------------------|-----------------------|--------------------|-----------------------|--------------------|
|                                                     | Nintedanib<br>(n=304) | Placebo<br>(n=196) | Nintedanib<br>(n=334) | Placebo<br>(n=226) |
| Serious adverse event(s)*                           | 60 (19.7)             | 45 (23.0)          | 134 (40.1)            | 81 (35.8)          |
| Most frequent serious adverse event(s) <sup>†</sup> |                       |                    |                       |                    |
| Progression of IPF <sup>‡</sup>                     | 11 (3.6)              | 10 (5.1)           | 31 (9.3)              | 29 (12.8)          |
| Pneumonia                                           | 8 (2.6)               | 2 (1.0)            | 15 (4.5)              | 14 (6.2)           |
| Pulmonary hypertension                              | 3 (1.0)               | 1 (0.5)            | 8 (2.4)               | 8 (3.5)            |
| Bronchitis                                          | 1 (0.3)               | 0 (0.0)            | 7 (2.1)               | 2 (0.9)            |
| Respiratory failure                                 | 1 (0.3)               | 3 (1.5)            | 1 (0.3)               | 5 (2.2)            |
| Fatal adverse event(s)                              | 8 (2.6)               | 6 (3.1)            | 29 (8.7)              | 25 (11.1)          |
| Most frequent fatal adverse event(s) <sup>§</sup>   |                       |                    |                       |                    |
| Pneumonia                                           | 0 (0.0)               | 0 (0.0)            | 5 (1.5)               | 2 (0.9)            |
| Progression of IPF <sup>‡</sup>                     | 4 (1.3)               | 3 (1.5)            | 14 (4.2)              | 13 (5.8)           |

\*An event that resulted in death, was immediately life-threatening, resulted in persistent or clinically significant disability or incapacity, required or prolonged hospitalisation, was related to a congenital anomaly or birth defect, or was deemed serious for any other reason. <sup>†</sup>Adverse events reported in >2% of patients in any of the subgroups shown. <sup>‡</sup>Corresponds to MedDRA term 'IPF', which included disease worsening and acute exacerbations of IPF. MedDRA, Medical Dictionary for Regulatory Activities. <sup>§</sup>Fatal adverse events reported in >1% of patients in any of the subgroups shown.
